# Supplementary material for: The neural stem-cell marker CD24 is specifically upregulated in IDH-mutant glioma
Source: PubMed Central journal article supplement — Transl Oncol. 2020 Jul 1;13(10):100819. doi: 10.1016/j.tranon.2020.100819 (PMC7332530; doi:10.1016/j.tranon.2020.100819), 2020-07-01
Supplement: mmc1.pdf [file mmc1.pdf]

## Supplementary Data

### The neural stem-cell marker *CD24* is specifically upregulated in IDH-mutant glioma

Patricia D. B. Tiburcio<sup>a,b,1</sup>, Mary C. Locke<sup>c</sup>, Srividya Bhaskara<sup>b,c</sup>, Mahesh B. Chandrasekharan<sup>c</sup>,  
L. Eric Huang<sup>a,b,\*</sup>

<sup>a</sup>Department of Neurosurgery, Clinical Neurosciences Center, University of Utah, Salt Lake City, Utah, USA

<sup>b</sup>Department of Oncological Sciences, Huntsman Cancer Institute, University of Utah, Salt Lake City, Utah, USA

<sup>c</sup>Department of Radiation Oncology, Huntsman Cancer Institute, University of Utah, Salt Lake City, Utah, USA

\*Address all correspondence to: L. Eric Huang, Department of Neurosurgery, Clinical Neurosciences Center, 175 North Medical Drive East, Salt Lake City, UT 84132, USA.

E-mail: [eric.huang@hsc.utah.edu](mailto:eric.huang@hsc.utah.edu)

---

<sup>1</sup>Current address: Children's Medical Center Research Institute at UT Southwestern.

**Supplementary Table 1.** Primer sequences of reverse transcription–quantitative PCR

| Gene         | Forward Primer (5'→3') | Reverse Primer (5'→3') |
|--------------|------------------------|------------------------|
| <i>CD24</i>  | ATGGGCAGAGCAATGGUG     | GGAATAAATCTGCGTGGGTAGG |
| <i>CD44</i>  | CGCCAAACACCCAAAGAA     | GTGTTGTCCTTCCTTGCATT   |
| <i>NES</i>   | GAGAACTCCCGGCTGCAA     | TTGGGGTCCTGAAAGCTGAG   |
| <i>PROM1</i> | AGATTTGGATGGCCTGGT     | GTCGTGGTTTGGCGTTGT     |
| <i>RPL30</i> | AGTCTTTCCTTCTCGTTCCCC  | GCCACCATCTTCCTGCCTTAG  |
| <i>UBC</i>   | GGTCGCAGTTCTTGTTTGTGG  | ACCAGTCAGAGTCTTCACGAA  |
| <i>YWHAZ</i> | CATCTTGGAGGGTCGTCT     | GCTCCGTCTCAATTTTCTCTCT |

**Supplementary Table 2.** Primer sequences of bisulfite DNA sequencing

| Gene        | Forward Primer (5'→3')    | Reverse Primer (5'→3')    |
|-------------|---------------------------|---------------------------|
| <i>CD24</i> | GTTAGGGTTTTTTAGGTTTAGTTTT | AAAATCCCATATTATTTTAACCCA  |
| <i>NES</i>  | GTATTTTGGGGAAGTAGGAATAGAG | TCTAACCCACTAAAAATAAACAAAC |

**Supplementary Table 3.** Primer sequences of chromatin immunoprecipitation–quantitative PCR

| Gene        | Forward Primer (5'→3') | Reverse Primer (5'→3') |
|-------------|------------------------|------------------------|
| <i>CD24</i> | GGACCGGGAGAGAATCTTG    | AGGGAATGGAAAAATGGGG    |
| <i>NES</i>  | CGTTGGAACAGAGGTTGGA    | ACTTTTCAGTAGCCCGCA     |

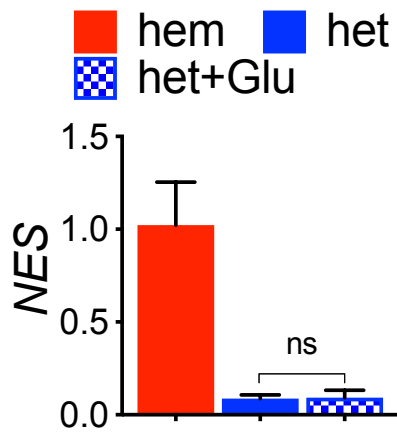

**Supplementary Figure 1.** Effect of glutamate on *NES* expression. The addition of glutamate to *IDH1<sup>R132H</sup>*-heterozygous BT142 spheroid growth (het+Glu) showing no significant effects on *NES* expression at the mRNA level, as assayed by quantitative PCR (n=4). ns, not significant.

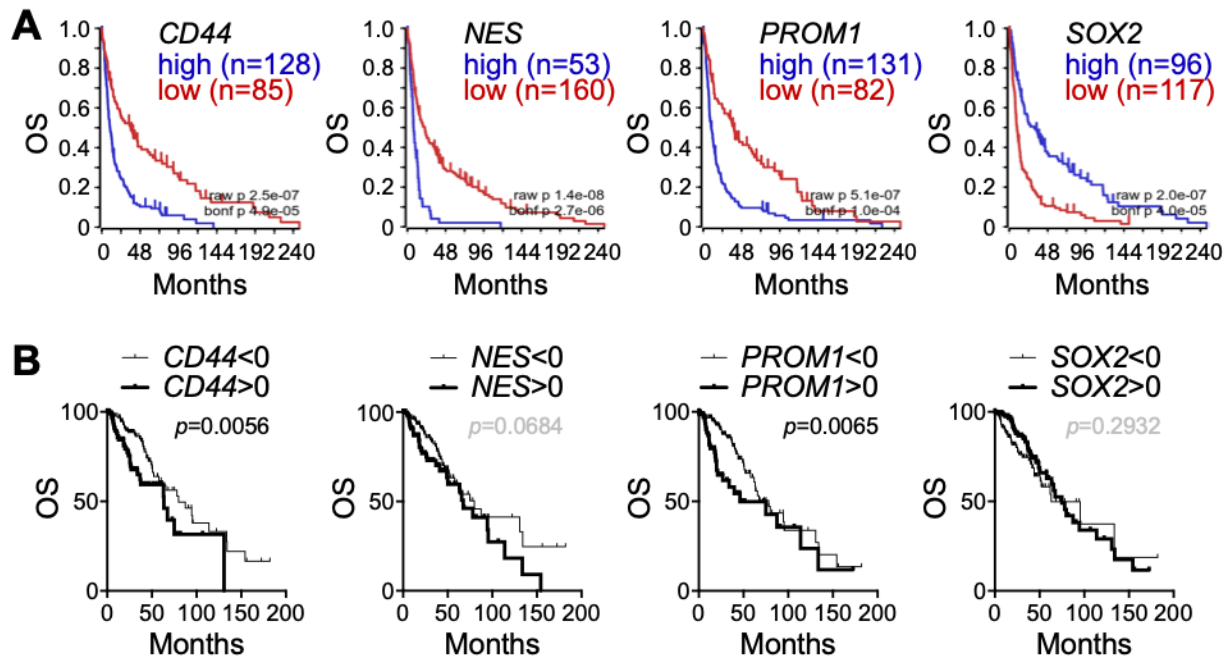

**Supplementary Figure 2.** Associations of glioma stem-cell marker genes with overall survival.

**A**, Kaplan–Meier survival analysis of the GSE16011 data set showing negative associations with *CD44*, *NES*, and *PROM1* expression. Bonferroni-corrected  $p = 4.9 \times 10^{-5}$  (*CD44*),  $2.7 \times 10^{-6}$  (*NES*), and  $1.0 \times 10^{-4}$  (*PROM1*). **B**, Log-rank tests of the TCGA-LGG data set confirming the negative associations with *CD44* and *PROM1*.

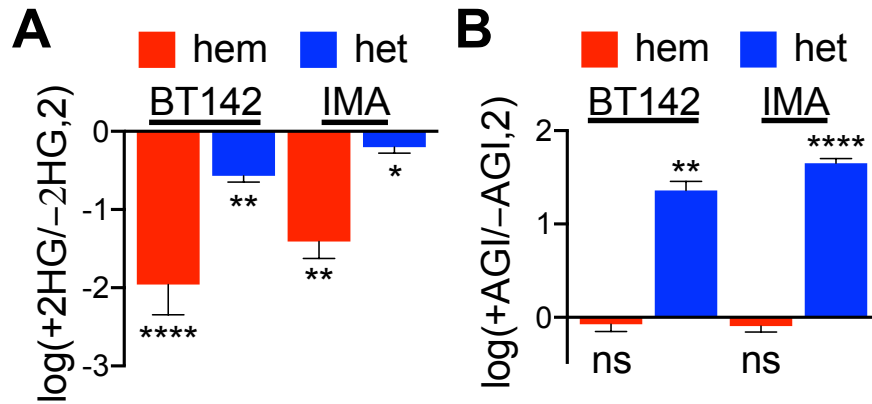

**Supplementary Figure 3.** D-2HG inhibits spheroid growth of glioma cells. **A**, octyl-(R)-2HG treatment resulting in marked decreases of *IDH1*<sup>R132H</sup>-hemizygous (hem) spheroid growth in BT142 and IMA cells (n=3). Fold changes are expressed in log<sub>2</sub> of treated (+2HG) versus untreated (-2HG). **B**, AGI-5198 treatment resulting in striking increases of *IDH1*<sup>R132H</sup>-heterozygous (het) spheroid growth (n=3). Fold changes are expressed in log<sub>2</sub> of treated (+AGI) versus untreated (-AGI). ns, not significant; \**p*<0.05; \*\**p*<0.01; and \*\*\*\**p*<0.0001.

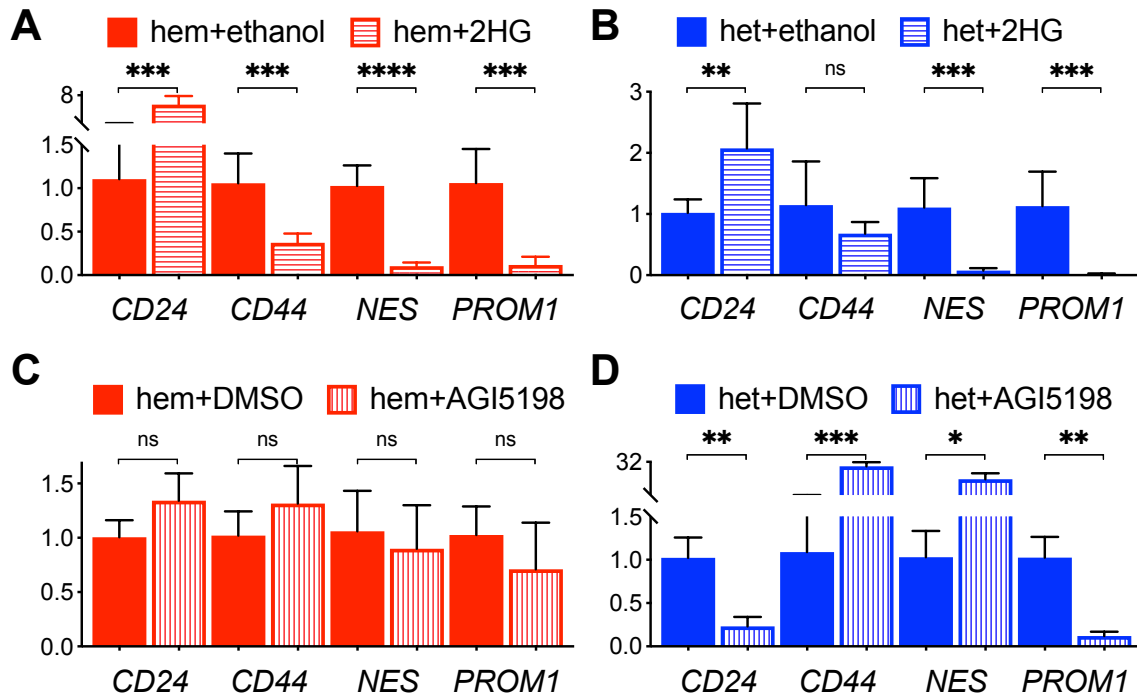

**Supplementary Figure 4.** Differential regulation of *CD24* and *NES* by D-2HG in IMA spheroid growth. **A** and **B**, Octyl-(R)-2HG treatment (+2HG) stimulating *CD24* expression in *IDH1<sup>R132H</sup>*-hemizygous spheroids (**A**) but inhibiting *NES* expression in both *IDH1<sup>R132H</sup>*-hemizygous and *IDH1<sup>R132H</sup>*-heterozygous spheroids (**B**) in reference to vehicle treatment (+ethanol). **C** and **D**, In contrast to modest effects in *IDH1<sup>R132H</sup>*-hemizygous spheroids (**C**), AGI-5198 treatment stimulating *NES* expression but inhibiting *CD24* expression in *IDH1<sup>R132H</sup>*-heterozygous spheroids (**D**). Gene expression was assayed with quantitative PCR (n=4). ns, not significant; \* $p < 0.05$ ; \*\* $p < 0.01$ ; \*\*\* $p < 0.001$ ; and \*\*\*\* $p < 0.0001$ .
